# Supplementary material for: Fiber-based lactate recordings with fluorescence resonance energy transfer sensors by applying an magnetic resonance-informed correction of hemodynamic artifacts
Source: PubMed Central journal article supplement (PMC9084224; doi:10.1117/1.nph.9.3.032212), 2022-05-09
Supplement: NPh_009_032212_SD001.pdf [file NPh_009_032212_SD001.pdf]

# **Fiber-based lactate recordings with fluorescence resonance energy transfer (FRET) sensors by applying an MR-informed correction of hemodynamic artifacts**

## **- Supplemental Materials –**

**Henriette Lambers<sup>a</sup>, Lydia Wachsmuth<sup>a</sup>, Dominik Thomas<sup>a</sup>, Fawzi Boumezbeur<sup>b</sup>, Vanessa Hoesker<sup>a</sup>, Bruno Pradier<sup>a</sup>, Cornelius Faber<sup>a,\*</sup>**

<sup>a</sup> University Hospital Münster, Translational Research Imaging Center (TRIC), Clinic for Radiology, Münster, Germany

<sup>b</sup> NeuroSpin, CEA, CNRS, Paris-Saclay University, Gif-Sur-Yvette, France

**Suppl. Table 1:** Overview of animals and experiments.

| experiment              | animal #                                                           | anaes-<br>thetia | venti-<br>lated | parlay-<br>zed | FRET sensor | injection | injected volume | remarks                        |
|-------------------------|--------------------------------------------------------------------|------------------|-----------------|----------------|-------------|-----------|-----------------|--------------------------------|
| fMRI-FRET <sup>a</sup>  | 1                                                                  | m <sup>l</sup>   | no              | no             | Laconic     | /         | /               | 2 measurements                 |
| fMRI-FRET <sup>a</sup>  | 2                                                                  | m <sup>l</sup>   | no              | no             | Laconic     | /         | /               | excluded (oscillatory)         |
| fMRI-FRET <sup>a</sup>  | 3                                                                  | m <sup>l</sup>   | yes             | no             | Laconic     | /         | /               | /                              |
| fMRI-FRET <sup>a</sup>  | 4                                                                  | m <sup>l</sup>   | yes             | yes            | Laconic     | /         | /               | /                              |
| fMRI-FRET <sup>a</sup>  | 5                                                                  | m <sup>l</sup>   | yes             | no             | Laconic     | /         | /               | 2 measurements                 |
| fMRI-FRET <sup>a</sup>  | 6                                                                  | m <sup>l</sup>   | no              | no             | Twitch-2B   | /         | /               | /                              |
| fMRI-FRET <sup>a</sup>  | 7                                                                  | m <sup>l</sup>   | no              | no             | Twitch-2B   | /         | /               | /                              |
| fMRI-FRET <sup>a</sup>  | 8                                                                  | m <sup>l</sup>   | yes             | yes            | Twitch-2B   | /         | /               | 2 measurements                 |
| fMRI-FRET <sup>a</sup>  | 9-11 <sup>j</sup>                                                  | m <sup>l</sup>   | yes             | no             | Twitch-2B   | /         | /               | 2 measurements                 |
| LFP <sup>b</sup>        | 12-16                                                              | m <sup>l</sup>   | no              | no             | /           | /         | /               | /                              |
| LFP <sup>b</sup>        | 17-21                                                              | m <sup>l</sup>   | no              | no             | /           | /         | /               | low temp./RR <sup>o</sup>      |
| phEPI-FRET <sup>c</sup> | 3-4 <sup>h</sup>                                                   | m <sup>l</sup>   | yes             | no             | Laconic     | lactate   | 2.5 mmol/kg     | phFRET excluded (signal drift) |
| phEPI-FRET <sup>c</sup> | 5 <sup>h</sup> ,22                                                 | m <sup>l</sup>   | yes             | no             | Laconic     | lactate   | 2.5 mmol/kg     | /                              |
| phEPI-FRET <sup>c</sup> | 9 <sup>h</sup>                                                     | m <sup>l</sup>   | yes             | no             | Twitch-2B   | lactate   | 2.5 mmol/kg     | /                              |
| phEPI-FRET <sup>c</sup> | 10 <sup>h</sup> ,11 <sup>h</sup> ,23 <sup>j</sup> ,24 <sup>j</sup> | m+i <sup>m</sup> | yes             | no             | Twitch-2B   | lactate   | 2.5 mmol/kg     | /                              |
| phEPI <sup>d</sup>      | 25                                                                 | m <sup>l</sup>   | yes             | no             | /           | lactate   | 2.5 mmol/kg     | /                              |
| phEPI <sup>d</sup>      | 26                                                                 | m <sup>l</sup>   | yes             | yes            | /           | lactate   | 2.5 mmol/kg     | /                              |
| phFRET <sup>e</sup>     | 27                                                                 | m <sup>l</sup>   | no              | no             | Laconic     | lactate   | 2.6 mmol/kg     | /                              |
| phFRET <sup>e</sup>     | 28,29                                                              | m <sup>l</sup>   | no              | no             | Laconic     | lactate   | 2.5 mmol/kg     | /                              |
| phFRET <sup>e</sup>     | 30                                                                 | m <sup>l</sup>   | no              | no             | Laconic     | lactate   | 2.6 mmol/kg     | low temp./RR <sup>o</sup>      |
| phFRET <sup>e</sup>     | 31 <sup>j</sup> , 32 <sup>k</sup>                                  | m+i <sup>m</sup> | yes             | no             | Laconic     | lactate   | 2.5 mmol/kg     | /                              |
| phFRET <sup>e</sup>     | 8 <sup>h</sup>                                                     | m <sup>l</sup>   | yes             | yes            | Twitch-2B   | saline    | 5 ml/kg         | excluded (signal drift)        |
| phFRET <sup>e</sup>     | 33, 34                                                             | m <sup>l</sup>   | yes             | no             | Twitch-2B   | saline    | 5 ml/kg         | /                              |
| blood analysis          | 35-37 <sup>i</sup>                                                 | i <sup>n</sup>   | no              | no             | /           | lactate   | 1.0 mmol/kg     | /                              |
| MRS <sup>f</sup>        | 11 <sup>j</sup> ,23 <sup>j</sup> ,24 <sup>j</sup> ,38 <sup>l</sup> | m <sup>l</sup>   | no              | no             | /           | lactate   | 2.5 mmol/kg     | /                              |
| MRS <sup>f</sup>        | 39                                                                 | m+i <sup>m</sup> | no              | no             | /           | lactate   | 2.5 mmol/kg     | excluded (high baseline)       |
| MRS <sup>f</sup>        | 31                                                                 | m+i <sup>m</sup> | no              | no             | /           | lactate   | 2.5 mmol/kg     | low temp./RR <sup>o</sup>      |
| phCBV <sup>g</sup>      | 32 <sup>i</sup> ,38,40,41                                          | m <sup>l</sup>   | no              | no             | /           | lactate   | 2.5 mmol/kg     | /                              |
| phCBV <sup>h</sup>      | 35-37 <sup>h</sup> ,42,43                                          | m <sup>l</sup>   | no              | no             | /           | saline    | 5 ml/kg         | /                              |

<sup>a</sup> simultaneous functional MRI and fluorescence resonance energy transfer measurements (fMRI-FRET)

<sup>b</sup> local field potential (LFP)

<sup>c</sup> simultaneous pharmacological echo planar imaging and fluorescence resonance energy transfer measurements (phEPI-FRET)

<sup>d</sup> pharmacological echo planar imaging (phEPI)

<sup>e</sup> pharmacological fluorescence resonance energy transfer measurements (phFRET)

<sup>f</sup> magnetic resonance spectroscopy (MRS)

<sup>g</sup> pharmacological cerebral blood volume measurements (phCBV)

<sup>h</sup> If both fFRET and phFRET were performed in the same animal, measurements were performed successively without delay.

<sup>i</sup> If blood analysis, MRS and/or phCBV were performed in the same animal, measurements were conducted on different days with at least one week between each experiment.

<sup>j</sup> If MRS and FRET measurements were performed in the same animal, MRS was performed first, followed by virus injection at least one week later; finally FRET experiments were performed at least four weeks after virus injection.

<sup>k</sup> If phCBV and FRET measurements were performed in the same animal, phCBV was performed first, followed by virus injection at least six week later; finally FRET experiments were performed at least four weeks after virus injection.

<sup>l</sup> medetomidine (m)

<sup>m</sup> medetomidine + 0.4 % isoflurane (m+i)

<sup>n</sup> 1.8 % isoflurane (i)

<sup>o</sup> temperature below 36.2 °C and/or RR below 35 beats per minutes

**Suppl. Table 2:** Overview of virus constructs used.

| shortcut                 | virus constructs                                                                                               | serotype | promotor                 | animals          |
|--------------------------|----------------------------------------------------------------------------------------------------------------|----------|--------------------------|------------------|
| Laconic (1) <sup>a</sup> | ssAAV-1/2-hSyn1-Laconic-WPRE-hGHp(A)                                                                           | 1        | hSyn1                    | 5,12,27,28,31,32 |
| Laconic (2) <sup>a</sup> | ssAAV-9/2-hCMV-dlox-Laconic(rev)-chl(rev)-dlox-WPRE-hGHp(A) +<br>ssAAV-9/2-mCaMKII $\alpha$ -iCre-WPRE-hGHp(A) | 9<br>9   | hCMV<br>mCaMKII $\alpha$ | 2,29             |
| Laconic (3) <sup>a</sup> | ssAAV-9/2-hCMV-dlox-Laconic(rev)-chl(rev)-dlox-WPRE-hGHp(A) +<br>ssAAV-9/2-hGFAP-hHBbl/E-iCre-WPRE-bGHp(A)     | 9<br>9   | hCMV<br>hGFAP            | 1,3              |
| Laconic (4) <sup>a</sup> | ssAAV-9/2-hCMV-dlox-Laconic(rev)-chl(rev)-dlox-WPRE-hGHp(A) +<br>ssAAV-9/2-hGFAP(2.2)-iCre-WPRE-bGHp(A)        | 9<br>9   | hCMV<br>hGFAP(2.2)       | 3,4              |
| Twitch-2B <sup>b</sup>   | pAAV.hSyn1.Twitch2B.WPRE.SV40                                                                                  | 1        | hSyn1                    | 6-11,23,24       |

<sup>a</sup> Laconic encoding virus constructs were obtained from the Viral vector Facility at ETH Zurich.

<sup>b</sup> The Twitch-2B encoding virus construct was obtained from Penn Vector Core at University of Pennsylvania.

**Suppl. Table 3:** Detailed information about components of the fiber-based FRET setup.

| acronym        | description                                                      | company                   | item #               | central    | reflection transmission cut-on |           |           |            |
|----------------|------------------------------------------------------------------|---------------------------|----------------------|------------|--------------------------------|-----------|-----------|------------|
|                |                                                                  |                           |                      | wavelength | bandwidth                      | band      | band      | wavelength |
| 458            | laser                                                            | Coherent, Germany         | OBIS LX<br>NDC-25C-4 | /          | /                              | /         | /         | /          |
| ND             | 2 neutral density filters                                        | Thorlabs, Germany         | + NE506B             | /          | /                              | /         | /         | /          |
| DM 480         | dichroic mirror                                                  | Thorlabs, Germany         | MD480                | 480        | /                              | 415 - 470 | 490 - 720 | /          |
| collimator     | fiber collimator                                                 | Thorlabs, Germany         | PAF2S-11A            | /          | /                              | /         | /         | /          |
| notch          | notch filter                                                     | Chroma, USA               | ZET457NF             | 457        | 21                             | /         | /         | /          |
| DM 498         | dichroic mirror                                                  | Thorlabs, Germany         | MD498                | 498        | /                              | 452 - 490 | 505-800   | /          |
| BP 479         | bandpass filter                                                  | Thorlabs, Germany         | MF479-40             | 479        | 40                             | /         | /         | /          |
| LP 480         | longpass filter                                                  | Edmund Optics,<br>Germany | Hoya Y48             | /          | /                              | /         | /         | 480        |
| lens           | focused fluorescence light to<br>the detectors                   | Thorlabs, Germany         | LB1471               | /          | /                              | /         | /         | /          |
| D <sub>d</sub> | APD (detected light emitted<br>from the donor fluorophore)       | Thorlabs, Germany         | APD440A2             | /          | /                              | /         | /         | /          |
| D <sub>a</sub> | APD (detected light emitted<br>from the acceptor<br>fluorophore) | Thorlabs, Germany         | APD440A2             | /          | /                              | /         | /         | /          |

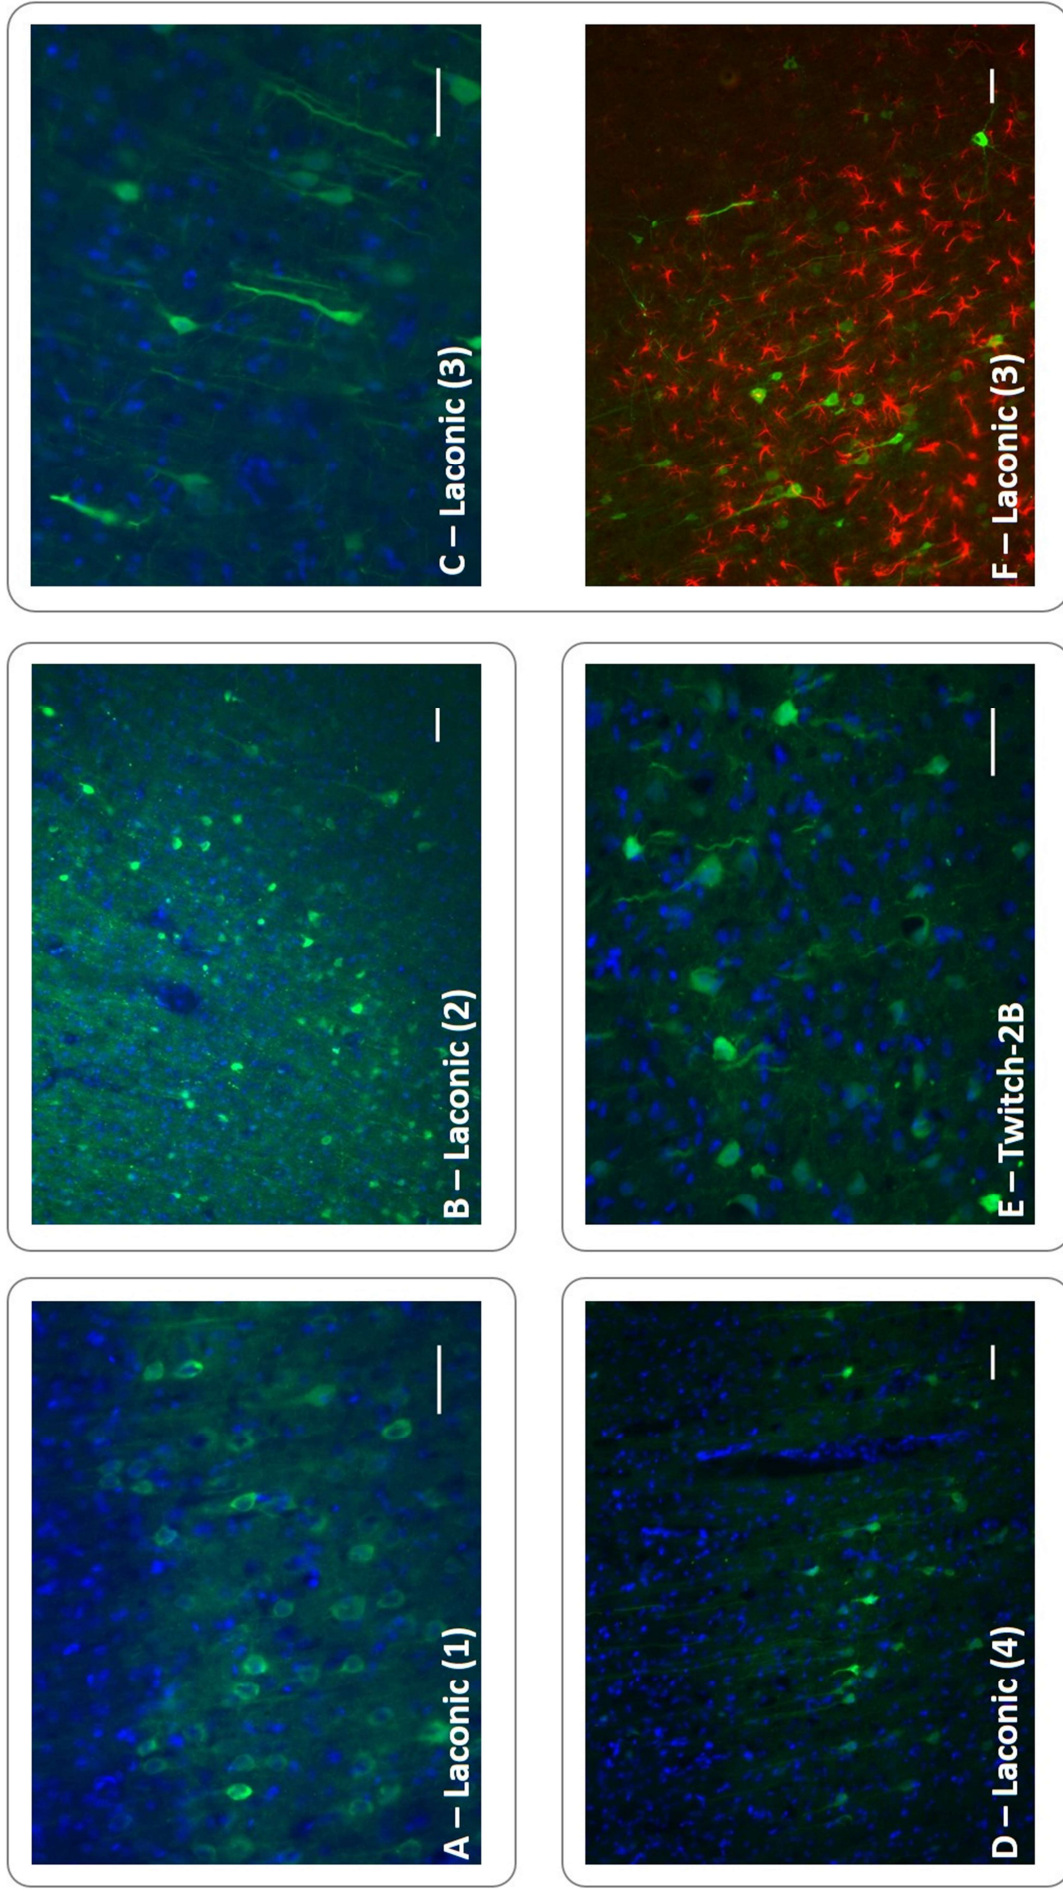

**Suppl. Fig. 1:** Exemplary histology of SIFL, showing expression of sensor proteins after injection of the virus constructs (Laconic (1-4), Twitch-2B). Virus constructs are listed in detail in Suppl. Table 2. Scale bars indicate 50  $\mu$ m. (A-E) Overlay of green fluorescent images, showing sensor expression, with blue DAPI co-staining to verify cell viability. (F) Second slice for viral construct Laconic (3), showing overlay of green fluorescent images with red immunostaining for GFAP (astrocytes, mCherry). All constructs caused FRET sensor expression in neurons. No expression in astrocytes was found, regardless of the promoter (Synapsin, CamKII or GFAP – see Suppl. Table 2) used. Therefore, we did not distinguish between the different viral constructs. Accordingly, we pooled our samples.

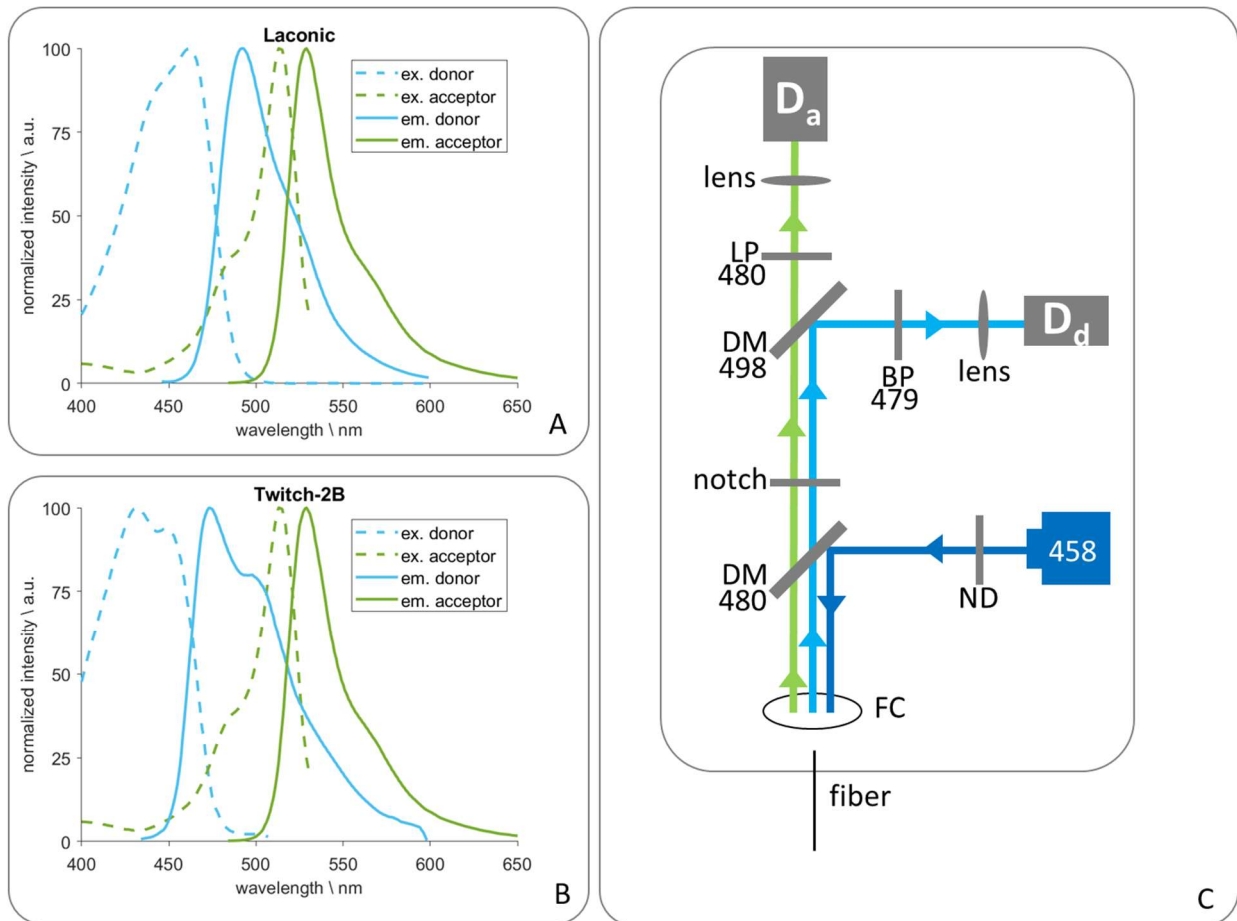

**Suppl. Fig. 2:** (A) Emission (dashed lines) and absorption spectra (solid lines) of Laconic<sup>18</sup> consisting of mTFP<sup>45</sup> and Venus<sup>46</sup> as donor (blue) and acceptor (green) fluorophore, respectively. (B) Emission and absorption spectra of Twitch-2B<sup>39</sup> consisting of mCerulean<sup>34</sup> and Venus<sup>46</sup> as donor and acceptor fluorophore, respectively. (C) Detailed schematic of the fiber-based FRET setup: A laser (458 nm) emitted excitation light (dark blue). Excitation light was reduced by neutral density filters (ND), reflected by a dichroic mirror (central wavelength (CWL): 480 nm) and coupled into a fiber. Fluorescent light emitted by the FRET sensors passed the dichroic mirror and a notch filter and was separated using a second dichroic mirror (CWL: 498 nm): Fluorescent light emitted by donor fluorophores (light blue) was reflected, filtered by a bandpass filter (CWL: 479 nm) and focused by a lens to an avalanche photodiode (APD, D<sub>d</sub>). Light emitted by acceptor fluorophores (green) passed both dichroic mirrors, a longpass filter (cut-on wavelength: 480 nm) and focused by a lens to a second APD (D<sub>a</sub>).

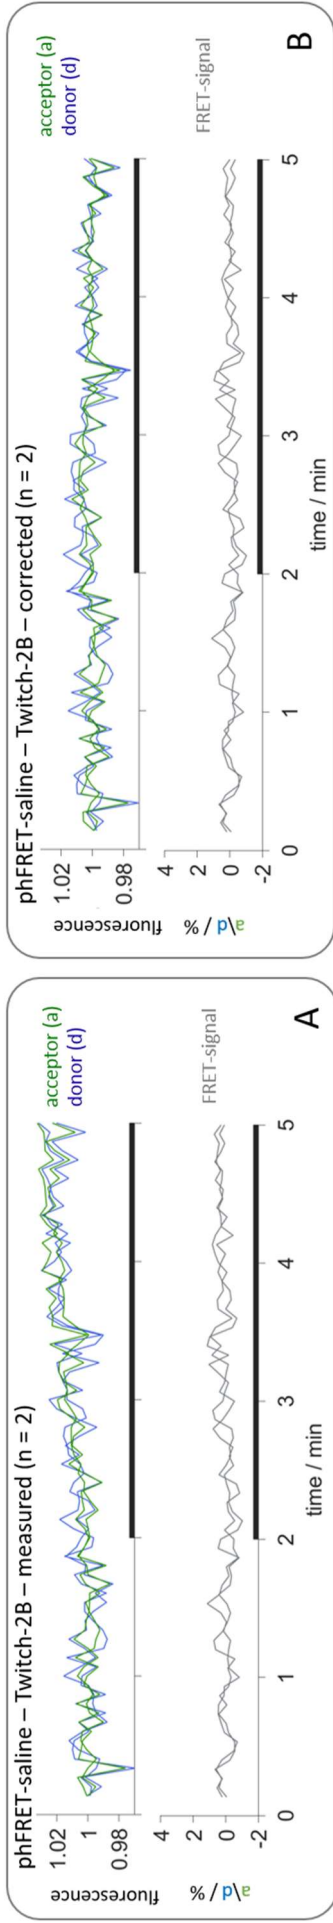

**Suppl. Fig. 3:** Individual fluorescence and FRET-signal time courses of n = 2 Twitch-2B-expressing animals during saline injection (black bars) (A) before and (B) after applying the correction algorithm.
